# Supplementary material for: Evaluation of the Antifungal Activities of Photorhabdus akhurstii and Its Secondary Metabolites against Phytopathogenic Colletotrichum gloeosporioides
Source: MDPI journal article supplement (doi:10.3390/jof8040403), 2022-04-15
Supplement: s1 [file s1]

## Supplementary Information

### Evaluation of the antifungal activities of *Photorhabdus akhurstii* and its secondary metabolites against phytopathogenic *Colletotrichum gloeosporioides*

Po-Wen Tu <sup>1,2</sup>, Jie-Siang Chiu <sup>3</sup>, Chih Lin <sup>1</sup>, Chih-Cheng Chien <sup>1</sup>, Feng-Chia Hsieh <sup>4</sup>, Ming-Che Shih <sup>1,3,\*</sup> and Yu-Liang Yang <sup>1,2,\*</sup>

<sup>1</sup>Agricultural Biotechnology Research Center, Academia Sinica, Taipei 11529, Taiwan

<sup>2</sup>Biotechnology Center in Southern Taiwan, Academia Sinica, Tainan 71150, Taiwan

<sup>3</sup>Institute of Plant Biology, College of Life Science, National Taiwan University, Taipei 10617, Taiwan

<sup>4</sup>Biopesticide Division, Taiwan Agricultural Chemicals and Toxic Substances Research Institute, Council of Agriculture, Taichung, 41358, Taiwan

\*Correspondence: ylyang@gate.sinica.edu.tw (Y.-L.Y.); mcshih@gate.sinica.edu.tw (M.-C.S.); Tel.: +886-6- 3032836 (Y.-L.Y.); +886-2-2787-2041 (M.-C.S.)

#### Tables

**Table S1.** The program performed on MPLC with the mobile-phase gradient

**Table S2.** The program performed on HPLC with the mobile-phase gradient

**Table S3.** NMR data of cepafungin I (Cep) and glidobactin A (Gli)

**Table S4.** Target genes and oligonucleotide primers sequences used in qRT-PCR

**Table S5.** Predicted BGCs of secondary metabolites from the genome sequences of *Photorhabdus akhurstii* sp. nov. 0813-124 phase I

**Table S6.** Comparison and predicted functions of encoded proteins in the glidobactin BGC for *Schlegelella brevitalea* sp. nov. DSM 7029 and *Photorhabdus akhurstii* sp. nov. 0813-124 phase I

#### Figures

**Figure S1.** MPLC profile of EA crude extract and concatenation portions.

**Figure S2.** <sup>1</sup>H-NMR spectrum of Cepafungin I.

**Figure S3.** <sup>1</sup>H- <sup>1</sup>H COSY NMR spectrum of Cepafungin I.

**Figure S4.** HSQC NMR spectrum of Cepafungin I.

**Figure S5.** <sup>1</sup>H-NMR spectrum of Glidobactin A.

**Figure S6.** <sup>1</sup>H- <sup>1</sup>H COSY NMR spectrum of Glidobactin A.

**Figure S7.** HSQC NMR spectrum of Glidobactin A.

**Figure S8.** Scheme of the separation PL1 extract and isolation of five bioactive peaks.

**Figure S9.** The LC-MS (EIC) profiles of active compounds in different incubation conditions.

**Figure S10.** Minimum inhibitory concentrations of PL1 extract and isolated compounds against *Colletotrichum gloeosporioides* spore.

#### References

**Table S1.** The program performed on MPLC with the mobile-phase gradient

| <b>Time (min)</b> | <b>Buffer A (%)</b> | <b>Buffer B (%)</b> | <b>Buffer C (%)</b> | <b>Flow rate (mL/min)</b> |
|-------------------|---------------------|---------------------|---------------------|---------------------------|
| 0-5               | 100                 | 0                   | 0                   | 20                        |
| 5-8               | 80                  | 20                  | 0                   | 20                        |
| 8-11              | 60                  | 40                  | 0                   | 20                        |
| 11-14             | 40                  | 60                  | 0                   | 20                        |
| 14-17             | 20                  | 80                  | 0                   | 20                        |
| 17-20             | 0                   | 100                 | 0                   | 20                        |
| 20-23             | 0                   | 80                  | 20                  | 20                        |
| 23-26             | 0                   | 60                  | 40                  | 20                        |
| 26-29             | 0                   | 40                  | 60                  | 20                        |
| 29-32             | 0                   | 20                  | 80                  | 20                        |
| 32-37             | 0                   | 0                   | 100                 | 20                        |

**Table S2.** The program performed on HPLC with the mobile-phase gradient

| <b>Time (min)</b> | <b>Buffer A (%)</b> | <b>Buffer B (%)</b> | <b>Flow rate (mL/min)</b> |
|-------------------|---------------------|---------------------|---------------------------|
| 0                 | 55                  | 45                  | 2.5                       |
| 10                | 55                  | 45                  | 2.5                       |
| 30                | 30                  | 70                  | 2.5                       |
| 31                | 0                   | 100                 | 2.5                       |
| 36                | 0                   | 100                 | 2.5                       |
| 37                | 55                  | 45                  | 2.5                       |
| 45                | 55                  | 45                  | 2.5                       |

**Table S3.** NMR data of cepafungin I (Cep) and glidobactin A (Gli) [1]

| Atom no.  | Type            | Stein et al., 2012 (500 MHz DMSO-d <sub>6</sub> ) |                     | This study (600 MHz DMSO-d <sub>6</sub> ) |                     |                |
|-----------|-----------------|---------------------------------------------------|---------------------|-------------------------------------------|---------------------|----------------|
|           |                 | $\delta_{\text{H,mult.}}$ (J in Hz)               | $\delta_{\text{C}}$ | $\delta_{\text{H,mult.}}$ (J in Hz)       | $\delta_{\text{C}}$ | COSY           |
| (Cep)1, 2 | CH <sub>3</sub> | 0.84, d (3.25)                                    | 23.03               | 0.84, d (6.63)                            | 22.29               | (Cep)3         |
| (Cep)3    | CH              | 1.50, m                                           | 27.82               | 1.49, m                                   | 27.25               | (Cep)1, 2, 4   |
| (Cep)4    | CH <sub>2</sub> | 1.15, m                                           | 38.86               | 1.15, m                                   | 38.15               | (Cep)3, 5      |
| (Gli)1    | CH <sub>3</sub> | 0.86, t (7.0)                                     | 14.46               | 0.86, t (7.0)                             | 14.23               | (Gli)3         |
| (Gli)3    | CH <sub>2</sub> | 1.26, m                                           | 31.68               | 1.26, m                                   | 31.86               | (Gli)1         |
| (Gli)4    | CH <sub>2</sub> | 1.26, m                                           | 26.21               | 1.26, m                                   | 26.23               |                |
| 5         | CH <sub>2</sub> | 1.26, m                                           | 27.08               | 1.26, m                                   | 26.25               |                |
| 6         | CH <sub>2</sub> | 1.26, m                                           | 29.21               | 1.26, m                                   | 28.28               | 7              |
| 7         | CH <sub>2</sub> | 1.39, m                                           | 28.81               | 1.41, m                                   | 28.24               | 6, 8, 9        |
| 8         | CH <sub>2</sub> | 2.13, m                                           | 32.76               | 2.13, m                                   | 32.20               | 7, 9, 10, 11   |
| 9         | CH              | 6.11, m                                           | 142.68              | 6.10, m                                   | 142.12              |                |
| 10        | CH              | 6.19, m                                           | 129.49              | 6.20, m                                   | 128.38              |                |
| 11        | CH              | 7.00, dd (15.0, 10.0)                             | 140.24              | 7.00, dd (15.12, 10.81)                   | 139.60              | 10, 12         |
| 12        | CH              | 6.13, m                                           | 123.49              | 6.12, m                                   | 123.18              |                |
| 13        | C(O)            | –                                                 | 165.88              | –                                         | 165.31              |                |
| 14        | NH              | 7.91, d (9.0)                                     | –                   | 7.90, d (8.83)                            | –                   | 15             |
| 15        | CH              | 4.29, m                                           | 58.49               | 4.28, dd (8.81, 4.1)                      | 58.04               | 14, 16         |
| 16        | CH              | 3.97, m                                           | 67.18               | 3.95, m                                   | 66.78               | 15, 17, 34     |
| 17        | CH <sub>3</sub> | 1.0, d (10)                                       | 20.46               | 1.00, d (6.31)                            | 19.79               | 17             |
| 18        | C(O)            | –                                                 | 169.86              | –                                         | 169.13              |                |
| 19        | NH              | 7.76, d (7.0)                                     | –                   | 7.74, d (7.82)                            | –                   | 20             |
| 20        | CH              | 4.34, m                                           | 51.66               | 4.68, m                                   | 50.85               | 19, 30         |
| 21        | C(O)            | –                                                 | 171.44              | –                                         | 169.22              |                |
| 22        | NH              | 8.69                                              | –                   | 8.67, br                                  | –                   | 23             |
| 23        | CH              | 4.37, m                                           | 45.21               | 4.37, m                                   | 44.45               | 22, 24, 26     |
| 24        | CH <sub>3</sub> | 1.22, m                                           | 19.05               | 1.20, m                                   | 18.5                | 23             |
| 25        | CH              | 6.41, d (15.0)                                    | 143.56              | 6.18, m                                   | 142.00              | 23, 26         |
| 26        | CH              | 6.19, m                                           | 140.23              | 6.40, d (12.77)                           | 143.05              | 23, 25         |
| 27        | C(O)            | –                                                 | 168.09              | –                                         | 169.17              |                |
| 28        | NH              | 7.44, t (5.5)                                     | –                   | 7.42, t (6.27)                            | –                   | 29             |
| 29        | CH <sub>2</sub> | 3.02, m                                           | 40.40               | 3.03, m                                   | 39.88               | 28, 30         |
| 30        | CH <sub>2</sub> | 1.45, m                                           | 40.07               | 1.43, m                                   | 39.6                | 29, 31         |
| 31        | CH              | 3.58, m                                           | 67.57               | 3.56, m                                   | 66.47               | 20, 30, 32, 33 |
| 32        | CH <sub>2</sub> | 1.85, m/1.58, d (11.5)                            | 42.93               | 1.84, m/1.58, d (10.41)                   | 44.45               | 20, 31         |
| 33        | OH              | Unassigned                                        | –                   | 4.67, br                                  | –                   | 31             |
| 33        | OH              | Unassigned                                        | –                   | 4.87, br                                  | –                   | 16             |

<sup>1</sup>The <sup>13</sup>C chemical shift was assigned based on HSQC and HMBC.

**Table S4.** Target genes and oligonucleotide primers sequences used in qRT-PCR

| Gene  | Description                                  | Blast hit |                | Primer sequence                                         |
|-------|----------------------------------------------|-----------|----------------|---------------------------------------------------------|
|       |                                              | E-value   | Accession      |                                                         |
| 09515 | Nuclear transport factor 2 family protein    | 1E-82     | WP_036807791.1 | F: TTTACGACGCCCTTCATTTTCC<br>R: TACGCAAACCTGGTTTCATTGCT |
| 09520 | Non-ribosomal peptide synthetase (NRPS)      | 0         | WP_046396347.1 | F: GTCTGCTTGCCGAGTTGTTG<br>R: CAACGTGATTTCAACGCCGA      |
| 09525 | Major facilitator superfamily transporter    | 0         | WP_046396348.1 | F: TCGTCAGGGACAACCTCTCT<br>R: ATGTCTGCCTGAGAACCACG      |
| 09530 | Hybrid NRPS/type I polyketide synthase (PKS) | 0         | WP_052739462.1 | F: CAATTTATGCCTCTGGCCGC<br>R: ATGGCCCTTGCTTCTGTACC      |
| 09535 | 2OG-Fe dioxygenase family protein            | 0         | WP_105395866.1 | F: ATGATGCGGCGATTTGTCAC<br>R: TCACTCTGTTTCGAGTGGGGT     |

**Table S5.** Predicted BGCs of secondary metabolites from the genome sequences of *Photorhabdus akhurstii* sp. nov. 0813-124 phase I

| Cluster | BGC-type     | Most similar known cluster                                                                             |
|---------|--------------|--------------------------------------------------------------------------------------------------------|
| 1       | Bacteriocin  | -                                                                                                      |
| 2       | Ppysks       | -                                                                                                      |
| 3       | Other        | -                                                                                                      |
| 4       | Terpene      | Carotenoid BGC<br>(83% of genes show similarity)                                                       |
| 5       | NRPS         | Rhabdopeptides BGC<br>(100% of genes show similarity)                                                  |
| 6       | NRPS         | -                                                                                                      |
| 7       | Thiopeptide  | O-antigen BGC<br>(14% of genes show similarity)                                                        |
| 8       | T1PKS - NRPS | Luminmycin BGC<br>(100% of genes show similarity)<br>Glidobactin BGC<br>(26% of genes show similarity) |
| 9       | Arylpolyene  | -                                                                                                      |
| 10      | Resorcinol   | Isopropylstilbene BGC<br>(100% of genes show similarity)                                               |
| 11      | T1PKS - NRPS | Yersiniabactin BGC<br>(4% of genes show similarity)                                                    |
| 12      | NRPS         | Streptomycin BGC<br>(2% of genes show similarity)                                                      |
| 13      | NRPS         | Turnerbactin BGC<br>(23% of genes show similarity)                                                     |
| 14      | NRPS         | Xenoamcins BGC<br>(12% of genes show similarity)                                                       |
| 15      | NRPS         | Glidobactin BGC<br>(15% of genes show similarity)                                                      |
| 16      | NRPS         | -                                                                                                      |
| 17      | T1PKS        | -                                                                                                      |
| 18      | NRPS         | Distamycin BGC<br>(14% of genes show similarity)                                                       |
| 19      | T1PKS - NRPS | -                                                                                                      |
| 20      | T1PKS - NRPS | Xenocoumacin BGC<br>(78% of genes show similarity)                                                     |
| 21      | T2PKS        | Anthraquinone BGC<br>(100% of genes show similarity)                                                   |
| 22      | Siderophore  | Desferrioxamine_B BGC<br>(60% of genes show similarity)                                                |

**Table S6.** Comparison and predicted functions of encoded proteins in the glidobactin BGC for *Schlegelella brevitalea* sp. nov. DSM 7029 and *Photorhabdus akhurstii* sp. nov. 0813-124 phase I [2,3]

| <i>S. brevitalea</i>   |                                           | <i>P. akhurstii</i>    |                 |                   |
|------------------------|-------------------------------------------|------------------------|-----------------|-------------------|
| Gene<br>(Product size) | Encoded putative function                 | Gene<br>(Product size) | Identity<br>(%) | Similarity<br>(%) |
| <i>glbA</i> (338 aa)   | Transcriptional regulator                 | -                      | -               | -                 |
| <i>glbB</i> (287 aa)   | Lysine 4-hydroxylase                      | 09535 (272 aa)         | 49.0            | 62.4              |
| <i>glbC</i> (4182 aa)  | NRPS/PKS                                  | 09530 (4129 aa)        | 51.6            | 66.3              |
| <i>glbD</i> (437 aa)   | Transporter                               | 09525 (421aa)          | 49.3            | 64.8              |
| <i>glbE</i> (74 aa)    | MbtH-like protein                         | -                      | -               | -                 |
| <i>glbF</i> (1084 aa)  | NRPS                                      | 09520 (1066 aa)        | 49.4            | 64.8              |
| <i>glbG</i> (122 aa)   | Nuclear transport factor 2 family protein | 09515 (119 aa)         | 50.0            | 60.7              |
| <i>glbH</i> (473 aa)   | 2-nitropropane dioxygenase                | -                      | -               | -                 |

<sup>1</sup> aa, amino acid; NRPS, non-ribosomal peptide synthetase; PKS, polyketide synthase.

<sup>2</sup> Identities and similarities in amino acid sequences of corresponding proteins were calculated using the online platform EMBOSS needle [4].

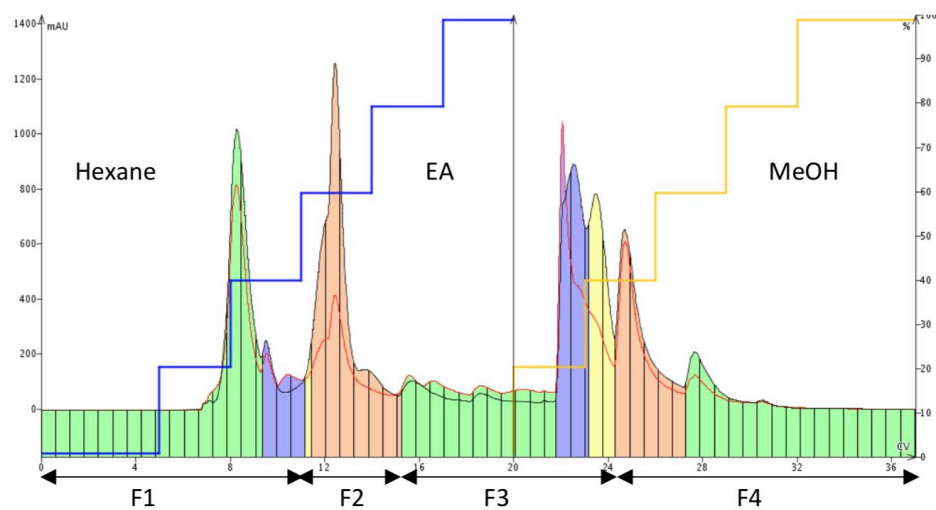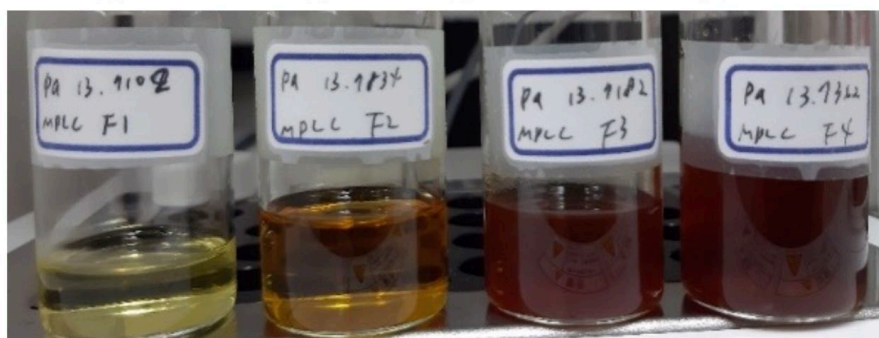

**Figure S1.** MPLC profile of EA crude extract and concatenation portions.



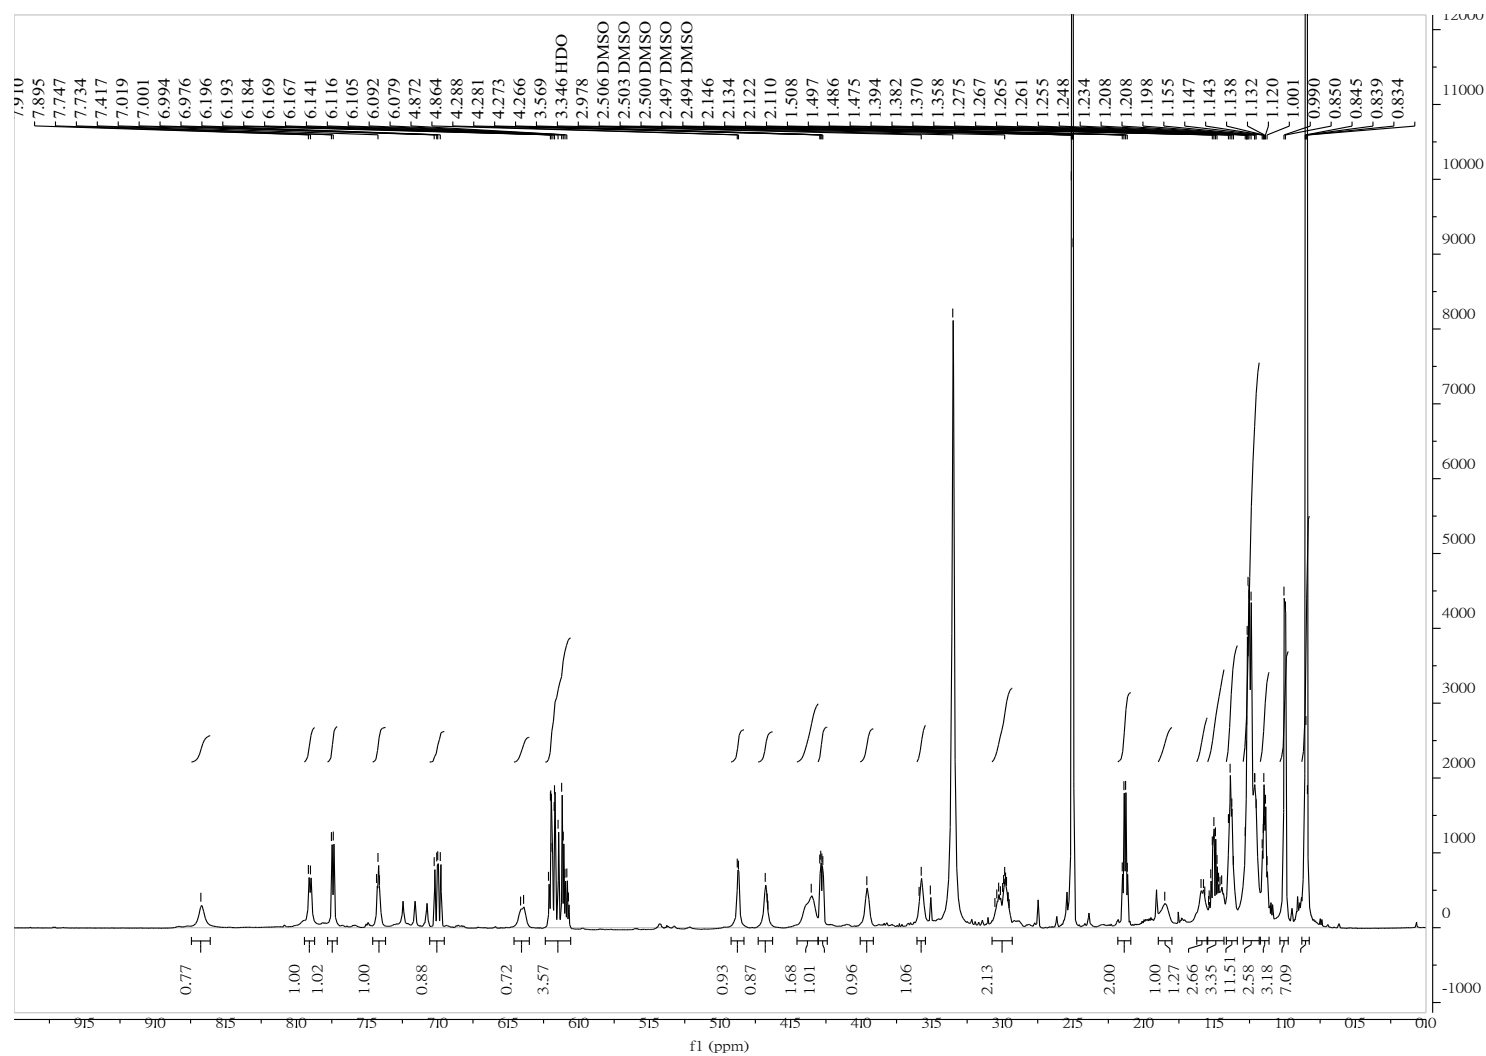

**Figure S2.** <sup>1</sup>H-NMR spectrum of Cepafungin I.

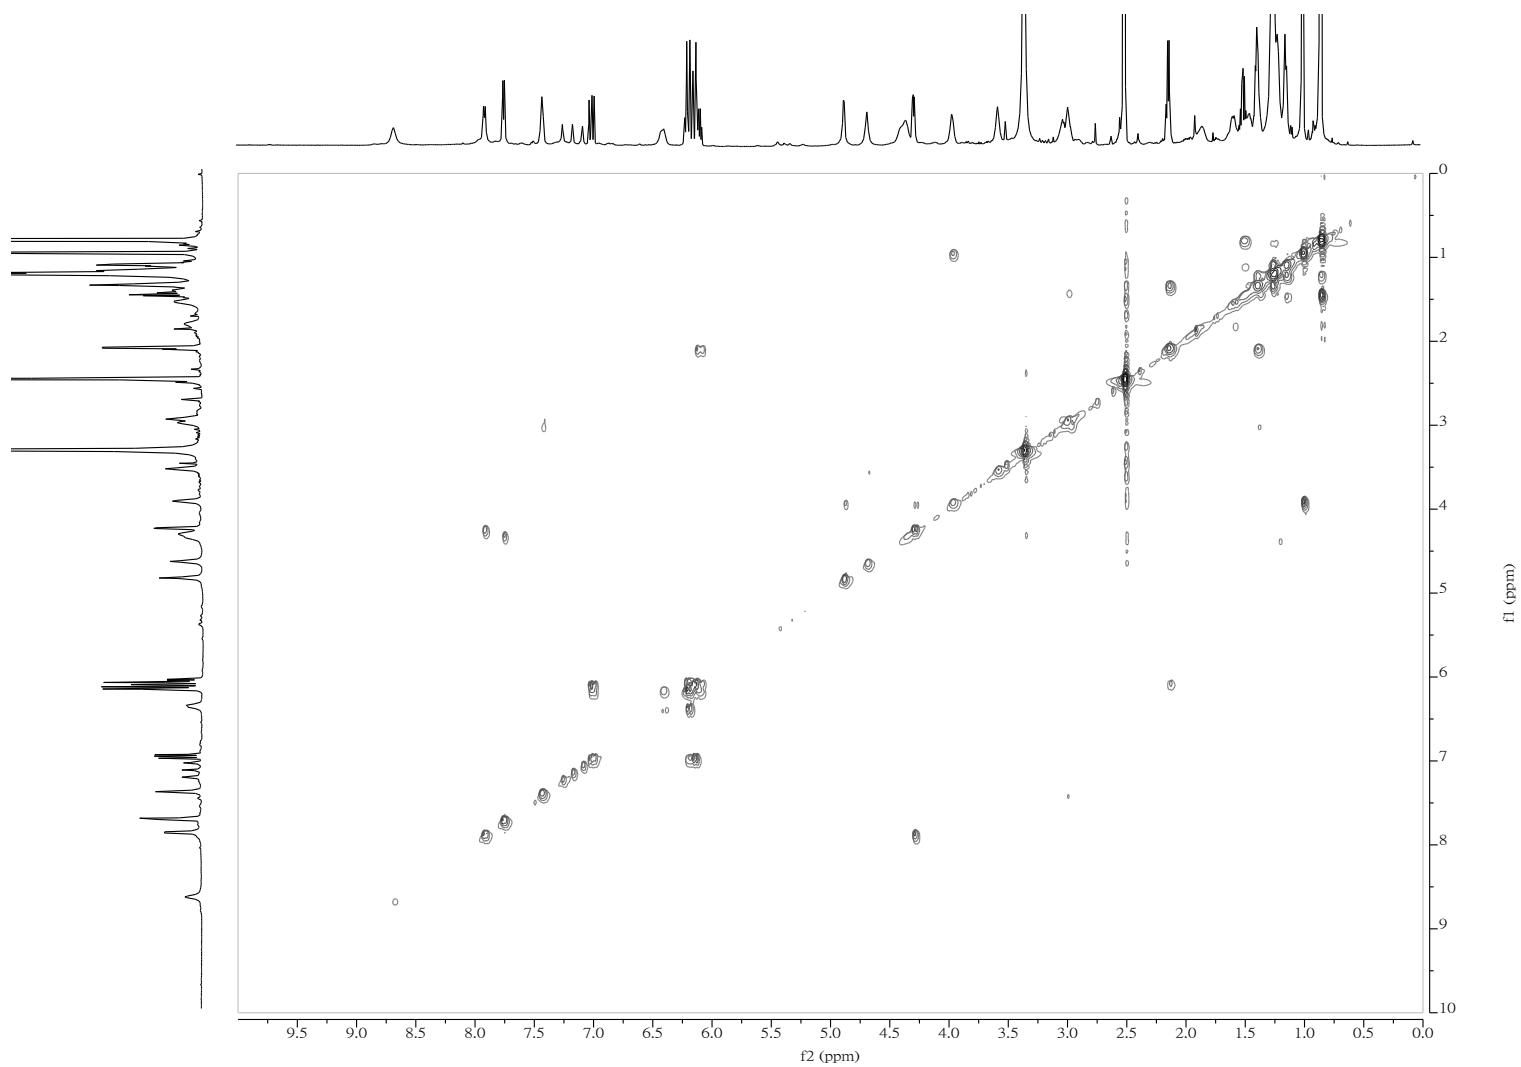

**Figure S3.**  $^1\text{H}$ - $^1\text{H}$  COSY NMR spectrum of Cepafungin I.

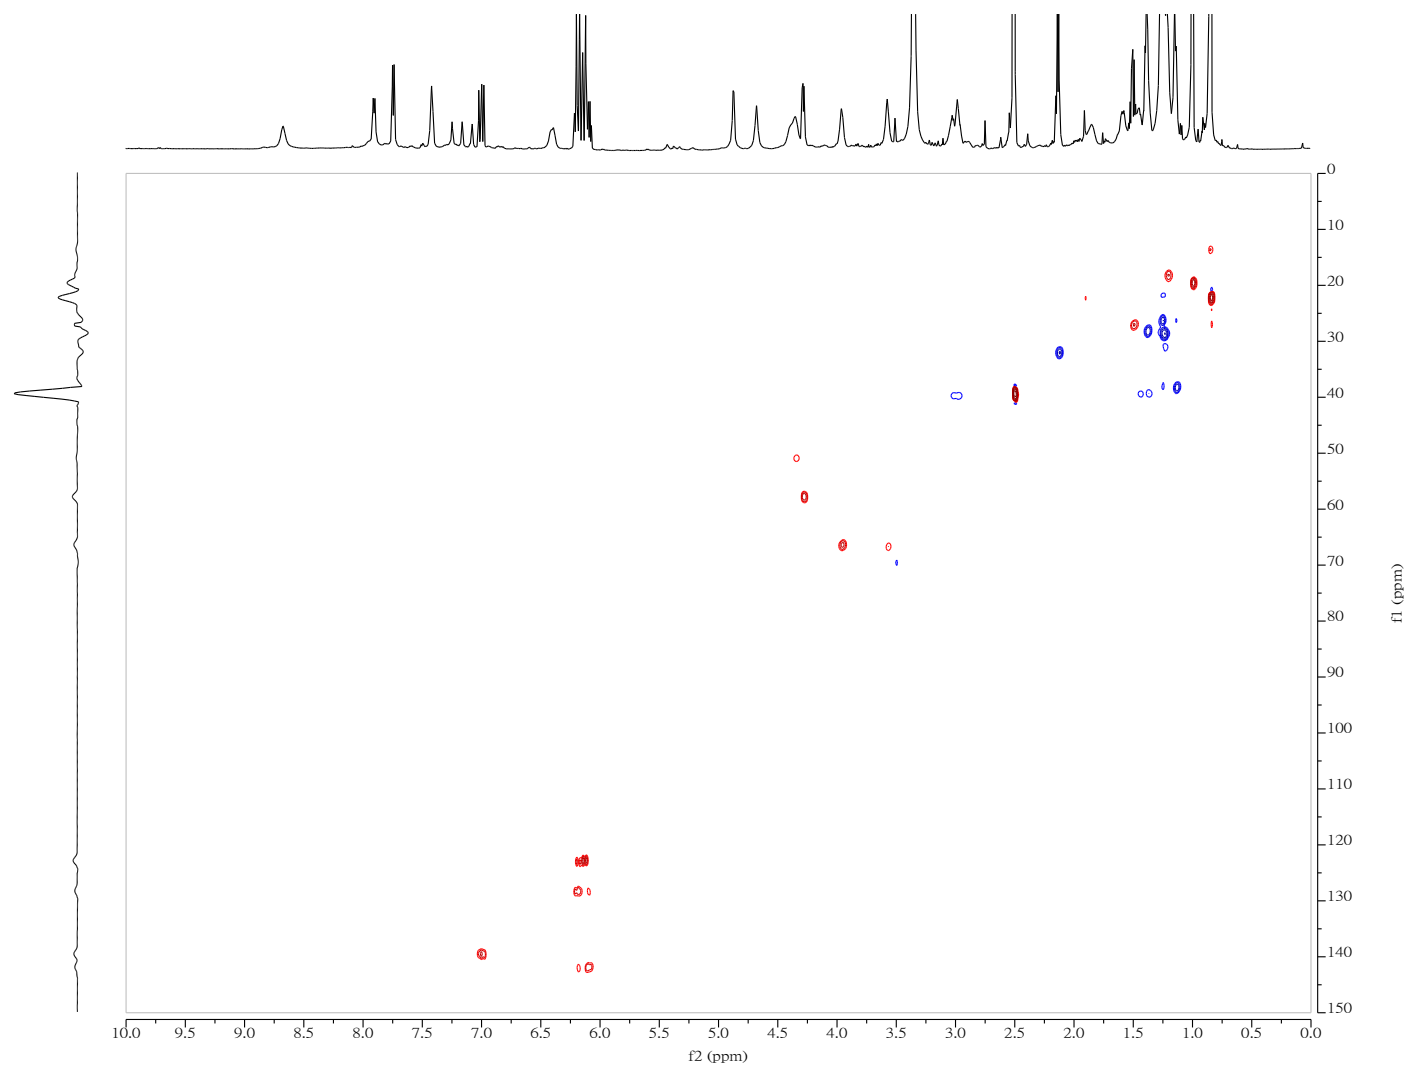

**Figure S4.** HSQC NMR spectrum of Cepafungin I.

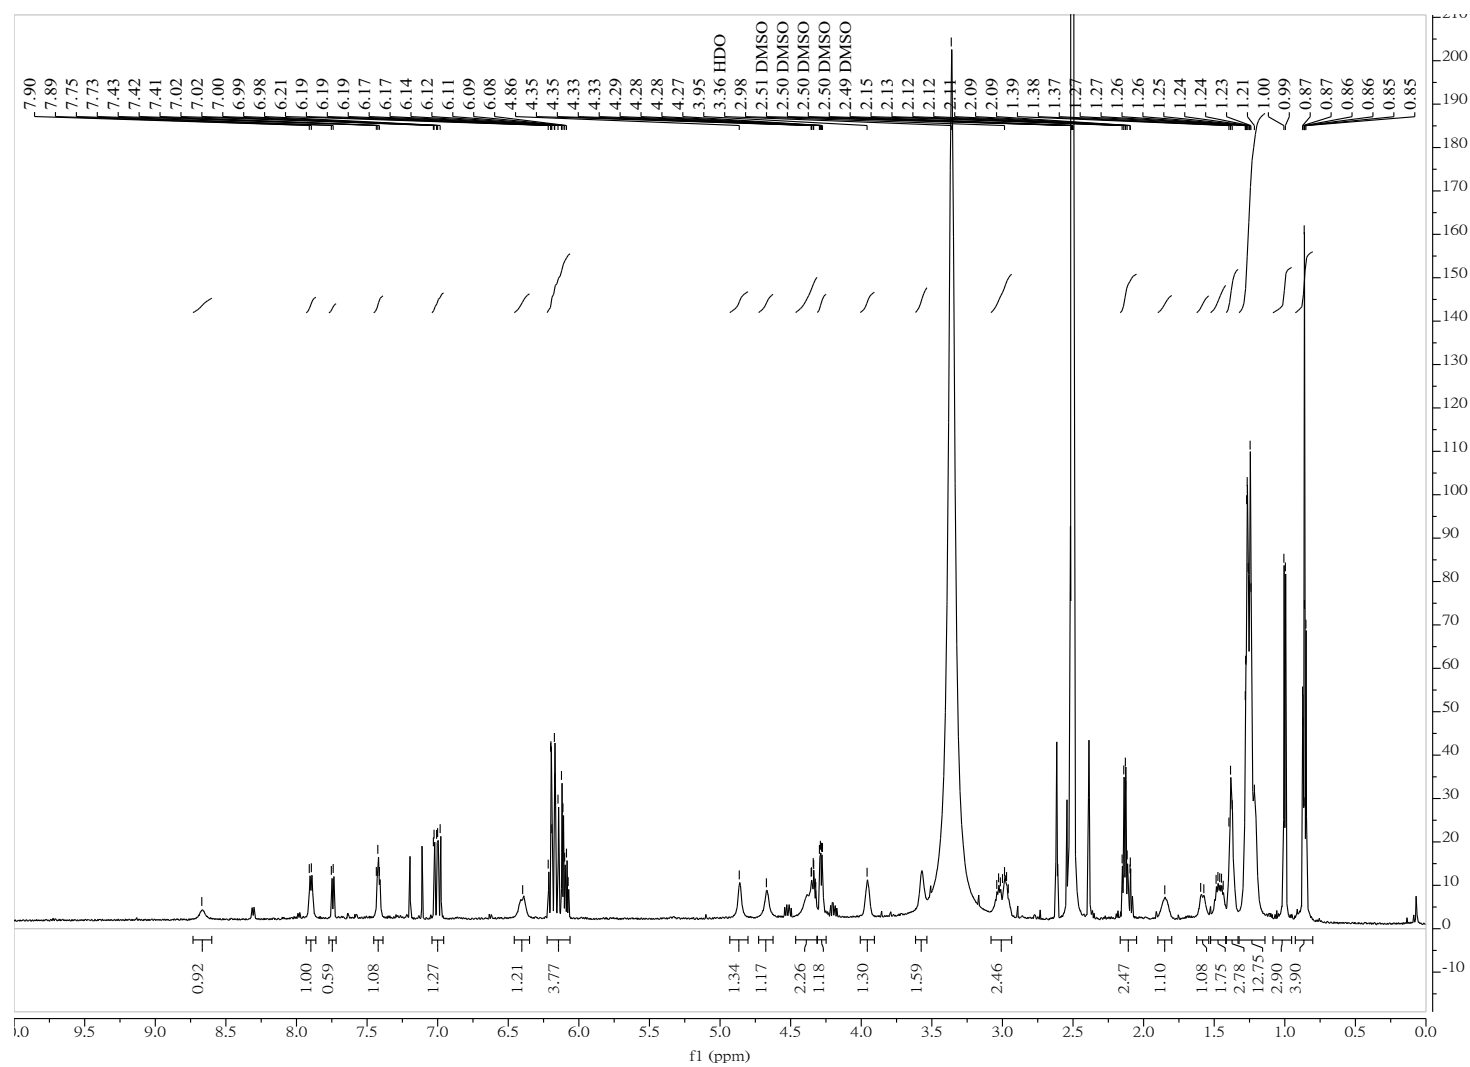

**Figure S5.**  $^1\text{H}$ -NMR spectrum of Glidobactin A.

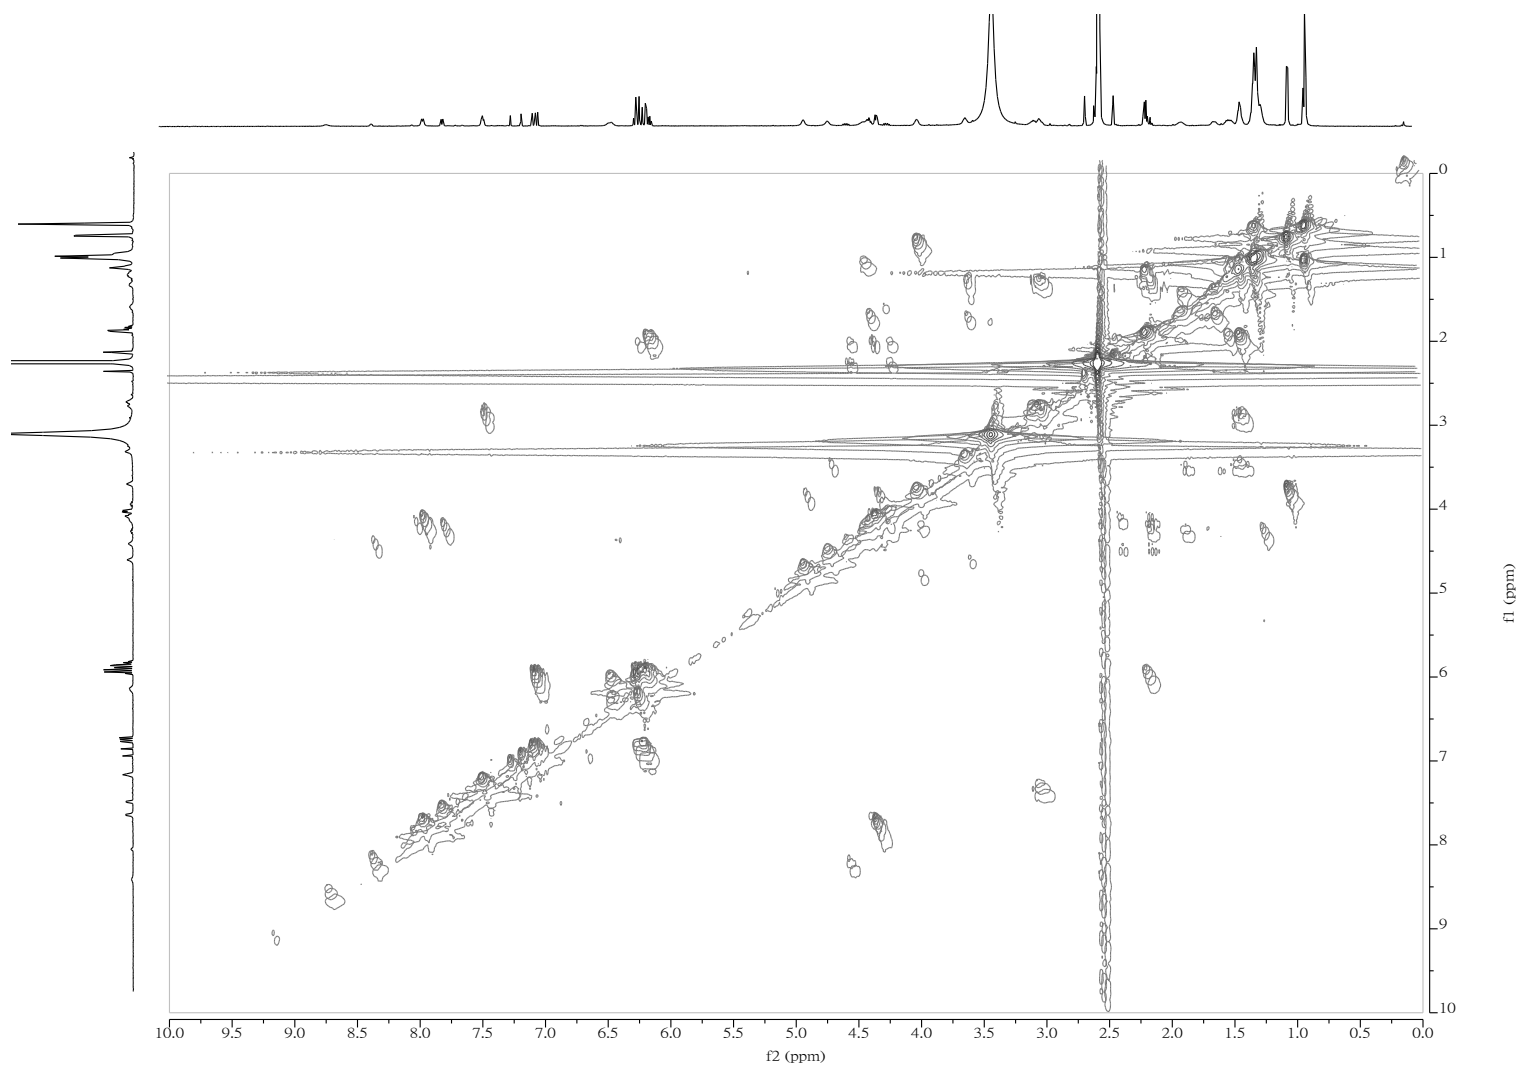

**Figure S6.**  $^1\text{H}$ - $^1\text{H}$  COSY NMR spectrum of Glidobactin A.

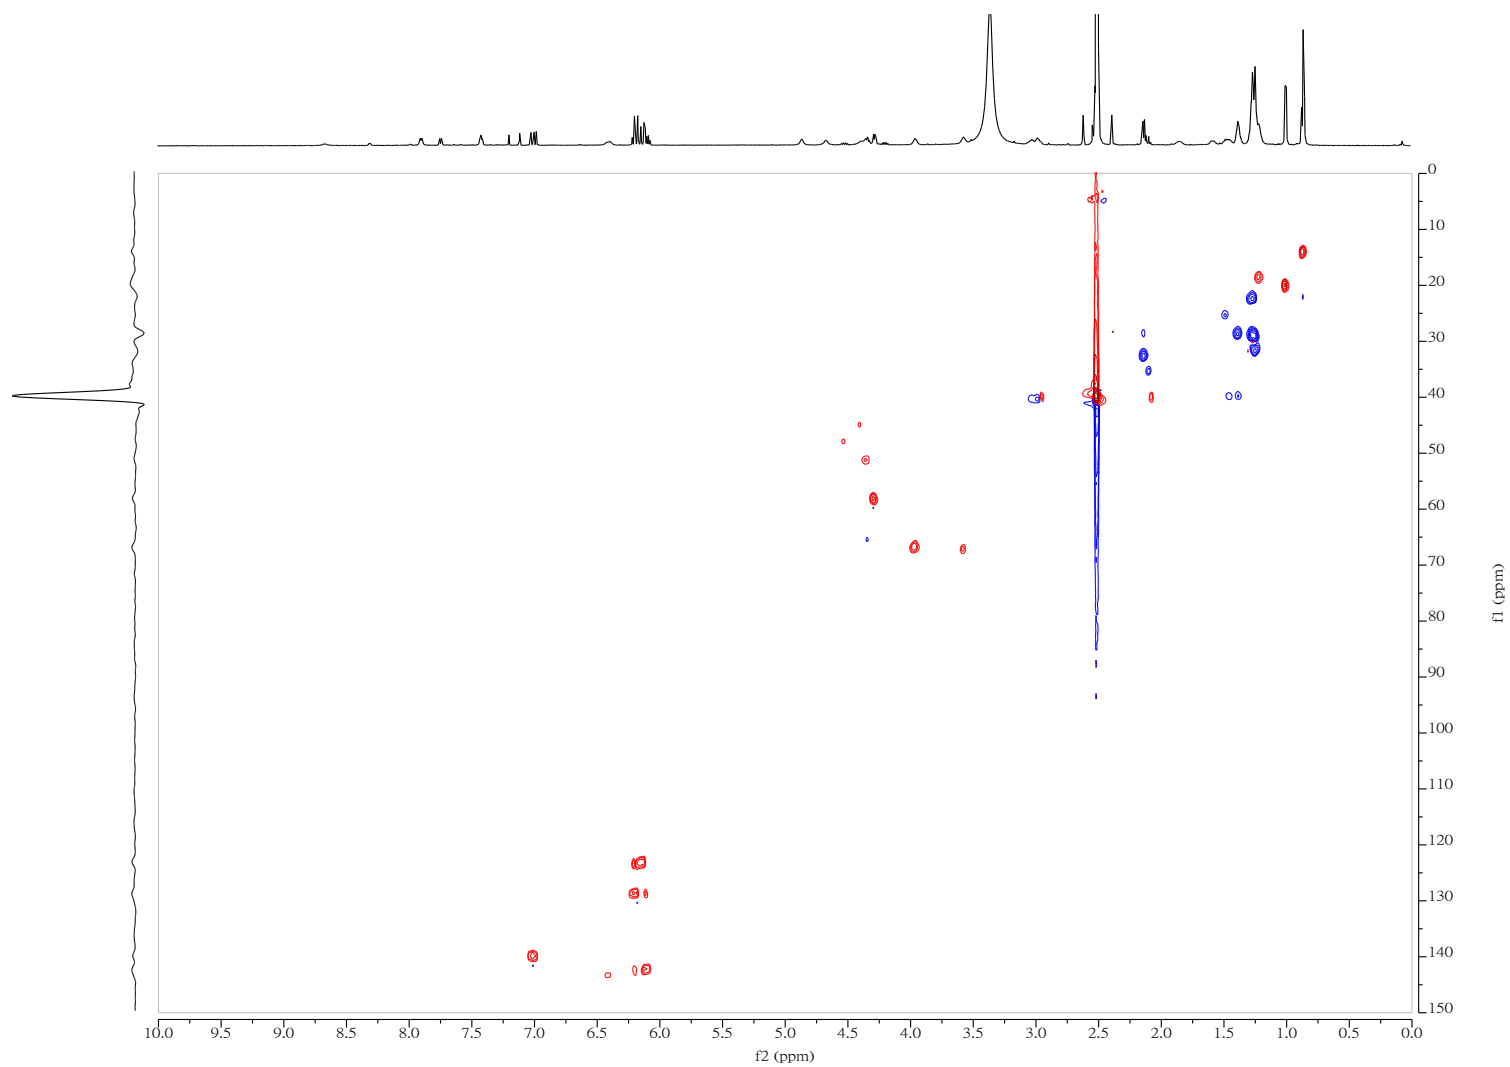

**Figure S7.** HSQC NMR spectrum of Glidobactin A.

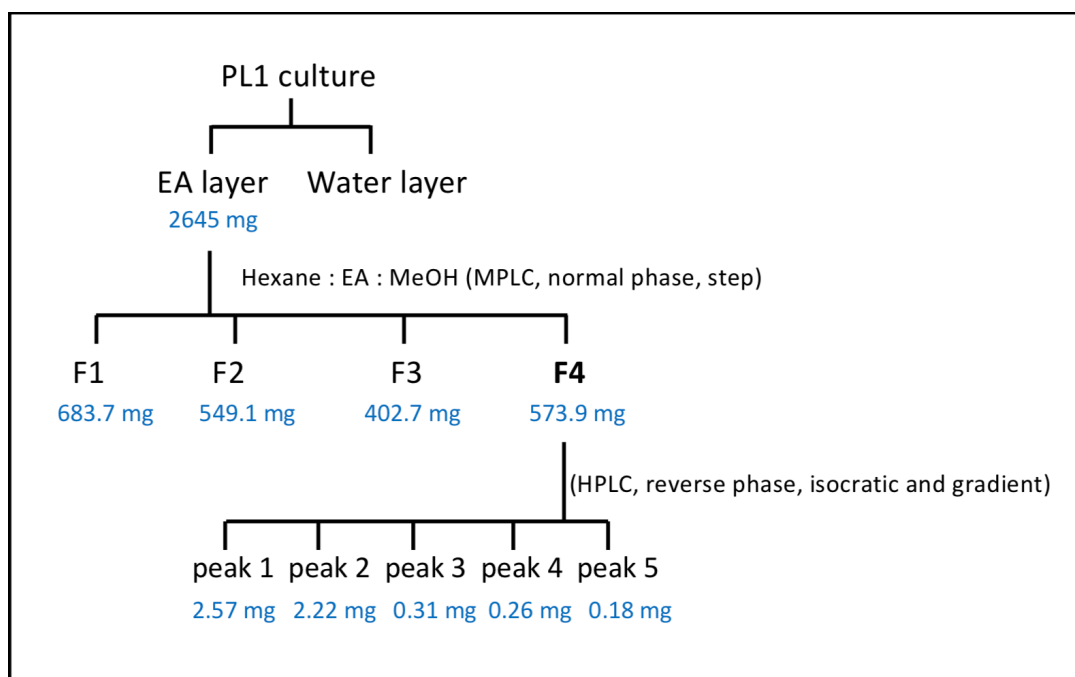

**Figure S8.** Scheme of the separation PL1 extract and isolation of five bioactive peaks.

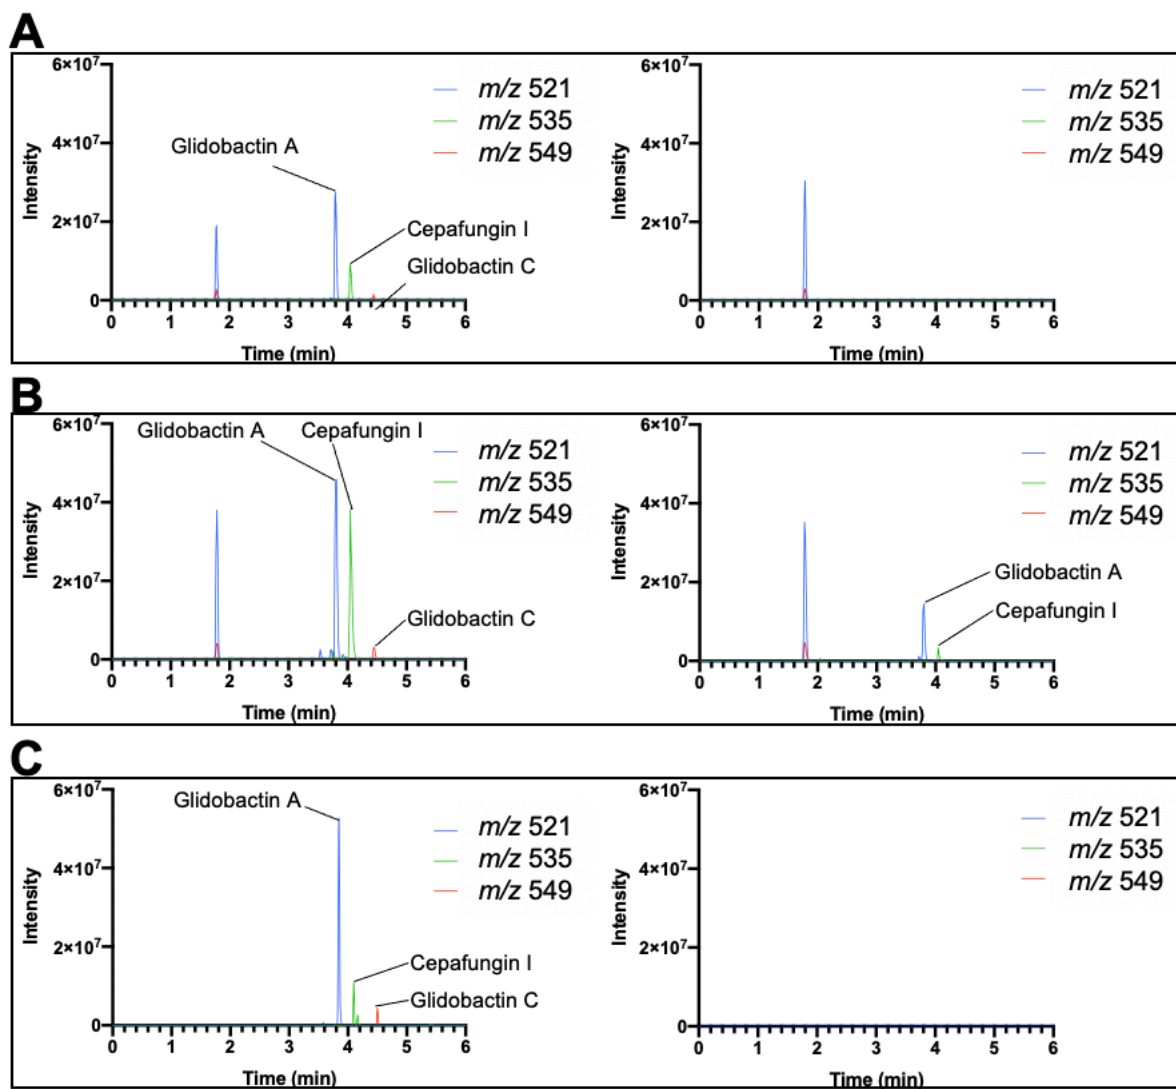

**Figure S9.** The LC-MS (EIC) profiles of active compounds in different incubation conditions, including LP agar (A), PDA (B), and PDB containing 0.5% tryptone (C) between PL1 (left) and PL2 (right).



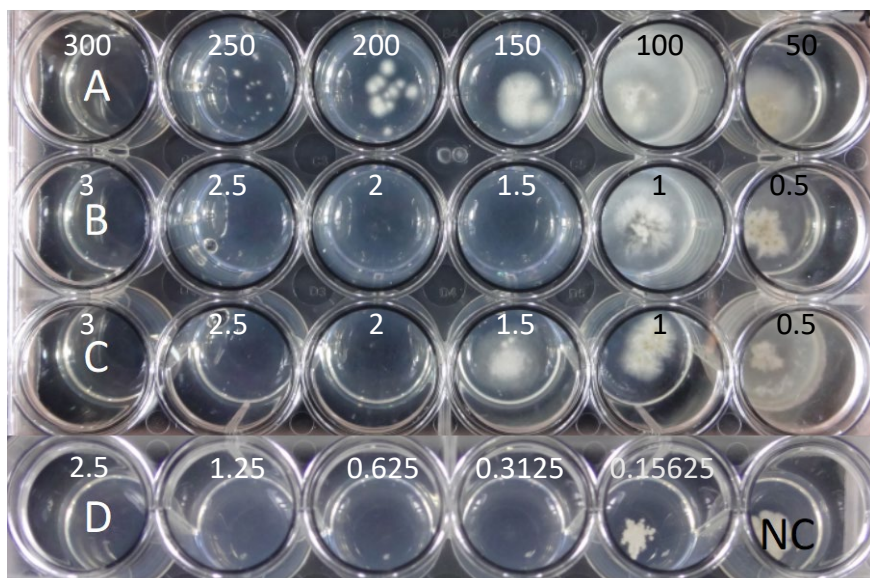

Concentration ( $\mu\text{g/mL}$ )

**Figure S10.** Minimum inhibitory concentrations of PL1 extract and isolated compounds against *Colletotrichum gloeosporioides* spore. **A:** PL1 crude extract; **B:** glidobactin A; **C:** cepafungin I; **D:** carbendazim. MICs were determined with consistent results repeated three times. NC: negative control.

## References

1. Stein, M.L.; Beck, P.; Kaiser, M.; Dudler, R.; Becker, C.F.W.; Groll, M. One-shot NMR analysis of microbial secretions identifies highly potent proteasome inhibitor. *Proc. Natl. Acad. Sci. U.S.A.* **2012**, *109*, 18367–18371, doi:10.1073/pnas.1211423109.
2. Zhao, L.; Le Chapelain, C.; Brachmann, A.O.; Kaiser, M.; Groll, M.; Bode, H.B. Activation, structure, biosynthesis and bioactivity of glidobactin-like proteasome inhibitors from *Photorhabdus laumondii*. *Chembiochem* **2021**, *22*, 1582–1588, doi:10.1002/cbic.202100014.
3. Bian, X.; Plaza, A.; Zhang, Y.; Müller, R. Luminmycins A–C, cryptic natural products from *Photorhabdus luminescens* identified by heterologous expression in *Escherichia coli*. *J. Nat. Prod.* **2012**, *75*, 1652–1655, doi:10.1021/np300444e.
4. Madeira, F.; Park, Y.M.; Lee, J.; Buso, N.; Gur, T.; Madhusoodanan, N.; Basutkar, P.; Tivey, A.R.N.; Potter, S.C.; Finn, R.D.; et al. The EMBL-EBI search and sequence analysis tools APIs in 2019. *Nucleic Acids Res.* **2019**, *47*, W636–W641, doi:10.1093/nar/gkz268.
